# Supplementary material for: Aflatoxin B1 Degradation by a Pseudomonas Strain
Source: PubMed Central journal article supplement (PMC4210884; doi:10.3390/toxins6103028), 2014-10-23
Supplement: toxins-06-03028-s001.pdf [file toxins-06-03028-s001.pdf]

## Supplementary Information

**Table S1.** AFB<sub>1</sub> degradation by individual microbial isolates selected using coumarin medium.

| No. | Isolate <sup>a</sup>                | Source                         | Degradation (%) <sup>b</sup> |
|-----|-------------------------------------|--------------------------------|------------------------------|
| 1   | <i>Pseudomonas aeruginosa</i> N17-1 | Soil from Changping, Beijing   | 82.8 ± 3.0                   |
| 2   | <i>Flavobacteriaceae</i> sp. 14     | Soil from Quyang, Shanxi       | 74.1 ± 3.2                   |
| 3   | <i>Pseudomonas</i> sp. F26-1        | Soil from Changping, Beijing   | 73.4 ± 4.0                   |
| 4   | 19-A                                | Soil from Guangzhou, Guangdong | 65.2 ± 4.4                   |
| 5   | NS10                                | Maize from Zhuozhou, Hebei     | 56.1 ± 4.5                   |
| 6   | NS6                                 | Maize from Changzhi, Shanxi    | 52.7 ± 2.5                   |
| 7   | NS8                                 | Maize from Baoji, Shanxi       | 45.6 ± 1.6                   |
| 8   | NS9                                 | Maize from Yancheng, Jiangsu   | 41.4 ± 4.7                   |
| 9   | 30                                  | Soil from Shaoguan, Guangdong  | 39.4 ± 3.0                   |
| 10  | 18                                  | Soil from Fuyang, Anhui        | 30.4 ± 3.5                   |
| 11  | NSL 25                              | Rice from Huaian, Jiangsu      | 30.1 ± 1.7                   |
| 12  | 16                                  | Soil from Shantou, Guangdong   | 24.8 ± 2.8                   |
| 13  | 29-D-1                              | Soil from Quyang, Shanxi       | 22.8 ± 1.9                   |
| 14  | 20                                  | Soil from Shaoguan, Guangdong  | 22.0 ± 1.6                   |
| 15  | NSL24                               | Rice from Huaian, Jiangsu      | 21.8 ± 2.2                   |
| 16  | M77                                 | Maize from Suzhou, Anhui       | 21.5 ± 1.2                   |
| 17  | M30                                 | Maize from Suzhou, Anhui       | 19.6 ± 3.6                   |
| 18  | 25-C                                | Soil from Shaoguan, Guangdong  | 16.1 ± 0.1                   |
| 19  | G-B                                 | Soil from Shantou, Guangdong   | 15.9 ± 0.3                   |
| 20  | NSL23                               | Rice from Yangzhou, Jiangsu    | 15.3 ± 2.5                   |
| 21  | 25-B                                | Soil from Shaoguan, Guangdong  | 15.0 ± 0.1                   |
| 22  | M15                                 | Maize from Suzhou, Anhui       | 13.9 ± 3.6                   |
| 23  | E-D                                 | Soil from Guangzhou, Guangdong | 12.8 ± 3.3                   |
| 24  | 11-B                                | Soil from Dianbai, Guangdong   | 11.7 ± 0.1                   |
| 25  | F4-1                                | Soil from Changping, Beijing   | 11.0 ± 1.3                   |

<sup>a</sup> Individual microbial isolates grown on medium with coumarin as the sole carbon source; <sup>b</sup> The detoxification tests were conducted in the dark at 37 °C for 72 h. The percentage of AFB<sub>1</sub> degradation was calculated using the following formula:  $(1 - \text{AFB}_1 \text{ peak area in treatment} / \text{AFB}_1 \text{ peak area in control}) \times 100\%$ .

**Table S2.** Characteristics of strain N17-1.

| <b>Item</b>                                | <b>Result <sup>a</sup></b> | <b>Item</b>                              | <b>Result</b> | <b>Item</b>                                    | <b>Result</b> |
|--------------------------------------------|----------------------------|------------------------------------------|---------------|------------------------------------------------|---------------|
| Cell shape                                 | rod-shaped                 | D-Salicin                                | –             | D-Glucuronic                                   | +             |
| Gram stain                                 | –                          | <i>N</i> -Acetyl-D-Glucosamine           | +             | Glucuronic acid amide                          | +             |
| Catalase activity                          | +                          | <i>N</i> -Acetyl- $\beta$ -D-Mannosidase | –             | Mucic                                          | –             |
| Oxidase activity                           | +                          | <i>N</i> -Acetyl-D-Galactosamine         | –             | Quinine acid                                   | +             |
| Spore formation                            | –                          | <i>N</i> -Acetyl-Ceramide                | –             | <i>p</i> -Hydroxy acid                         | +             |
| Nitrate reduction                          | +                          | $\alpha$ -D-Glucose                      | +             | Methyl pyruvate                                | +             |
| Hydrolysis of casein                       | +                          | D-Mannose                                | –             | D-Methyl lactate                               | –             |
| Hydrolysis of starch                       | +                          | D-Fructose                               | –             | L-Lactate                                      | +             |
| <b>API20E</b>                              |                            | D-Galactose                              | –             | Citrate                                        | +             |
| Utilization of citrate                     | +                          | D-Serine                                 | –             | $\alpha$ -Ketoglutarate                        | +             |
| Production of Indole                       | –                          | D-Fucose                                 | +             | Biolog GEN III<br>(Chemical sensitivity tests) |               |
| Production of H <sub>2</sub> S             | –                          | Sugar                                    | –             | Positive control                               | +             |
| Voges-Proskauer test                       | –                          | L-Rhamnose                               | –             | Growth at pH 6.0                               | +             |
| Arginine double hydrolase                  | +                          | Inositol                                 | –             | Growth at pH 5.0                               | +             |
| Tryptophan deaminase                       | –                          | Glycerin                                 | +             | Growth at 4% NaCl                              | +             |
| Urease                                     | +                          | D-Glucose-6-phosphate                    | +             | Minocycline                                    | +             |
| Lysine decarboxylase                       | –                          | D-Fructose-6-phosphate                   |               | 1% Lactate                                     | +             |
| <b>Biolog GEN III (Growth experiments)</b> |                            | D-Aspartic acid                          |               | Fusidic acid                                   | +             |
| Negative control                           | –                          | Gelatin                                  | +             | D-Serine                                       | +             |
| L-Galacturonic acid lactone                | –                          | Stachyose                                | –             | Troleandomycin                                 | +             |
| D-Maltose                                  | –                          | L-Alanine                                | –             | Rifamycin SV                                   | +             |
| D-Trehalose                                | –                          | L-Arginine                               | +             | Lincomycin                                     | +             |
| D-Cellobiose                               | –                          | L-Aspartate                              | +             | Guanidine<br>hydrochloride                     | +             |
| Gentiobiosyl                               | –                          | L-Glutamate                              | +             | Tetradecyl sulfate                             | +             |
| $\beta$ -hydroxy-D, L-butyric acid         | +                          | L-Histidine                              | +             | Vancomycin                                     | +             |
| Glycine-L-proline                          | +                          | L-Pyroglutamate                          | +             | Tetrazolium violet                             | +             |
| 3-methyl-D-glucose                         | –                          | Turanose                                 | –             | Nalidixic acid-resistant                       | +             |
| D-Raffinose                                | –                          | Pectin                                   | –             | Potassium tellurite                            | +             |
| $\alpha$ -D-Lactose                        | –                          | Dextrin                                  | –             | Aztreonam                                      | +             |
| D-Melibiose                                | –                          | Sugar acid                               | –             | Sodium butyrate                                | +             |
| $\beta$ -Methyl-D-Glucamine                | –                          | D-Gluconate                              | +             | Blue tetrazolium                               | +             |

<sup>a</sup> “+” means positive response; “–” means negative response.
